# Supplementary material
Source: PubMed Central journal article supplement (PMC6204683)
Supplement: zjm999096136s1.pdf [file zjm999096136s1.pdf]

Dinkelacker et al.: “Typing and species identification of clinical *Klebsiella* isolates by matrix-assisted laser desorption/ionization time-of-flight mass spectrometry and Fourier-transform infrared spectroscopy”

## SUPPLEMENTARY MATERIAL

Figure S1

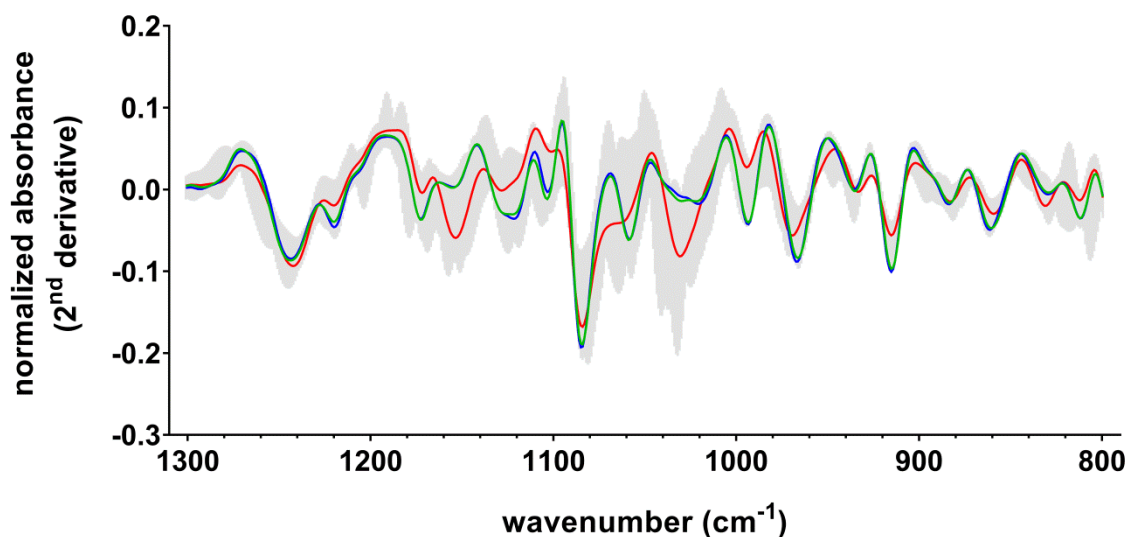

**FTIR spectra.** Representative isolate spectra (ID5 – green, ID6 – blue, ID30 – red) are shown. Grey shading represents the range between the minimum and maximum normalized absorbance of all 68 isolate spectra at each wavenumber.

**Figure S2**

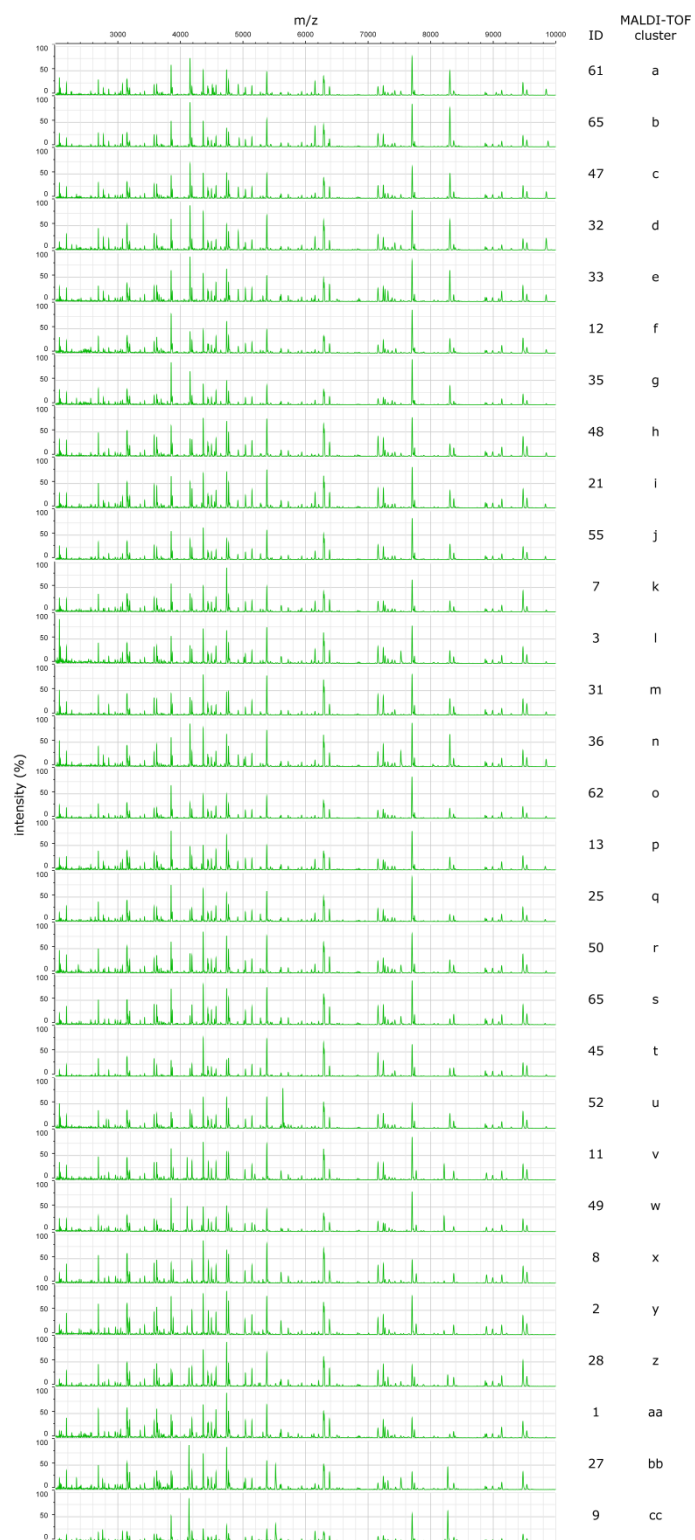

**MALDI-TOF spectra.** The 2,000-10,000  $m/z$  spectrum range of one representative isolate spectrum from each MALDI-TOF cluster is shown.

**Table S1**

| <b>Isolate #</b> | <b>Month and year of collection</b> | <b>Patient #</b> |
|------------------|-------------------------------------|------------------|
| ID 1             | 12-2013                             | Pat 1            |
| ID 2             | 01-2014                             | Pat 2            |
| ID 3             | 01-2014                             | Pat 3            |
| ID 4             | 01-2014                             | Pat 4            |
| ID 5             | 01-2014                             | Pat 5            |
| ID 6             | 01-2014                             | Pat 6            |
| ID 7             | 01-2014                             | Pat 4            |
| ID 8             | 01-2014                             | Pat 7            |
| ID 9             | 01-2014                             | Pat 8            |
| ID 10            | 01-2014                             | Pat 3            |
| ID 11            | 01-2014                             | Pat 9            |
| ID 12            | 02-2014                             | Pat 10           |
| ID 13            | 02-2014                             | Pat 11           |
| ID 14            | 02-2014                             | Pat 12           |
| ID 15            | 02-2014                             | Pat 10           |
| ID 16            | 02-2014                             | Pat 13           |
| ID 17            | 02-2014                             | Pat 14           |
| ID 18            | 03-2014                             | Pat 15           |
| ID 19            | 03-2014                             | Pat 16           |
| ID 20            | 03-2014                             | Pat 17           |
| ID 21            | 03-2014                             | Pat 18           |
| ID 22            | 03-2014                             | Pat 19           |
| ID 23            | 03-2014                             | Pat 20           |
| ID 24            | 03-2014                             | Pat 21           |
| ID 25            | 03-2014                             | Pat 22           |
| ID 26            | 04-2014                             | Pat 23           |
| ID 27            | 04-2014                             | Pat 24           |
| ID 28            | 04-2014                             | Pat 8            |
| ID 29            | 04-2014                             | Pat 25           |
| ID 30            | 05-2014                             | Pat 26           |
| ID 31            | 05-2014                             | Pat 21           |
| ID 32            | 06-2014                             | Pat 27           |
| ID 33            | 06-2014                             | Pat 28           |
| ID 34            | 06-2014                             | Pat 29           |
| ID 35            | 06-2014                             | Pat 30           |
| ID 36            | 06-2014                             | Pat 31           |
| ID 37            | 06-2014                             | Pat 32           |
| ID 38            | 06-2014                             | Pat 33           |
| ID 39            | 06-2014                             | Pat 34           |
| ID 40            | 06-2014                             | Pat 27           |
| ID 41            | 06-2014                             | Pat 35           |
| ID 42            | 06-2014                             | Pat 36           |

|       |         |        |
|-------|---------|--------|
| ID 43 | 06-2014 | Pat 16 |
| ID 44 | 06-2014 | Pat 37 |
| ID 45 | 07-2014 | Pat 35 |
| ID 46 | 07-2014 | Pat 38 |
| ID 47 | 08-2014 | Pat 35 |
| ID 48 | 08-2014 | Pat 39 |
| ID 49 | 08-2014 | Pat 40 |
| ID 50 | 08-2014 | Pat 41 |
| ID 51 | 08-2014 | Pat 16 |
| ID 52 | 08-2014 | Pat 42 |
| ID 53 | 09-2014 | Pat 43 |
| ID 54 | 09-2014 | Pat 44 |
| ID 55 | 09-2014 | Pat 45 |
| ID 56 | 09-2014 | Pat 46 |
| ID 57 | 09-2014 | Pat 47 |
| ID 58 | 09-2014 | Pat 48 |
| ID 59 | 10-2014 | Pat 49 |
| ID 60 | 10-2014 | Pat 50 |
| ID 61 | 10-2014 | Pat 51 |
| ID 62 | 10-2014 | Pat 52 |
| ID 63 | 10-2014 | Pat 53 |
| ID 64 | 10-2014 | Pat 54 |
| ID 65 | 10-2014 | Pat 55 |
| ID 66 | 10-2014 | Pat 53 |
| ID 67 | 10-2014 | Pat 56 |
| ID 68 | 11-2014 | Pat 57 |

**Isolate characteristics.** Isolate numbers and corresponding collection date and patient numbers are indicated.

**Table S2**

| ID | WGS cluster | <i>K. pneumoniae</i><br>HS11286 | <i>K. pneumoniae</i><br>NJST258_2 | <i>K. quasipneumoniae</i><br>ATCC700603 | <i>K. quasipneumoniae</i><br>HKUOPA4 | <i>K. variicola</i><br>GJ1 | <i>K. variicola</i><br>At-22 |
|----|-------------|---------------------------------|-----------------------------------|-----------------------------------------|--------------------------------------|----------------------------|------------------------------|
| 32 | A           | 99,2                            | 99,2                              | 94,0                                    | 94,0                                 | 94,7                       | 94,7                         |
| 48 | B           | 99,2                            | 99,1                              | 94,0                                    | 94,0                                 | 94,7                       | 94,7                         |
| 1  | C           | 99,2                            | 99,1                              | 94,0                                    | 94,0                                 | 94,7                       | 94,7                         |
| 26 | D           | 99,2                            | 99,2                              | 94,0                                    | 94,0                                 | 94,7                       | 94,7                         |
| 45 | E           | 99,1                            | 99,1                              | 94,0                                    | 94,0                                 | 94,6                       | 94,6                         |
| 46 | F           | 99,1                            | 99,0                              | 94,0                                    | 94,0                                 | 94,7                       | 94,6                         |
| 52 | G           | 99,2                            | 99,1                              | 94,0                                    | 94,0                                 | 94,7                       | 94,6                         |
| 3  | H           | 99,1                            | 99,1                              | 94,0                                    | 94,0                                 | 94,7                       | 94,7                         |
| 63 | I           | 99,2                            | 99,2                              | 94,0                                    | 94,0                                 | 94,7                       | 94,7                         |
| 56 | J           | 99,2                            | 99,1                              | 94,0                                    | 94,0                                 | 94,7                       | 94,7                         |
| 42 | K           | 99,1                            | 99,1                              | 94,0                                    | 94,0                                 | 94,6                       | 94,7                         |
| 31 | L           | 99,3                            | 99,3                              | 94,0                                    | 94,0                                 | 94,7                       | 94,7                         |
| 51 | M           | 99,2                            | 99,2                              | 94,0                                    | 94,0                                 | 94,6                       | 94,7                         |
| 12 | N           | 99,2                            | 99,2                              | 94,0                                    | 94,0                                 | 94,7                       | 94,7                         |
| 62 | O           | 99,2                            | 99,2                              | 93,9                                    | 94,0                                 | 94,7                       | 94,7                         |
| 50 | P           | 99,1                            | 99,1                              | 94,0                                    | 94,0                                 | 94,7                       | 94,7                         |
| 30 | Q           | 99,2                            | 99,2                              | 94,0                                    | 94,0                                 | 94,7                       | 94,7                         |
| 60 | R           | 99,2                            | 99,2                              | 93,9                                    | 94,0                                 | 94,7                       | 94,7                         |
| 53 | S           | 99,2                            | 99,2                              | 93,9                                    | 94,0                                 | 94,7                       | 94,7                         |
| 13 | T           | 99,2                            | 99,1                              | 94,0                                    | 94,0                                 | 94,7                       | 94,7                         |
| 34 | U           | 99,2                            | 99,2                              | 94,0                                    | 94,0                                 | 94,7                       | 94,7                         |
| 55 | V           | 99,3                            | 99,2                              | 94,0                                    | 94,0                                 | 94,7                       | 94,7                         |
| 61 | W           | 99,1                            | 99,1                              | 94,1                                    | 94,0                                 | 94,7                       | 94,7                         |
| 64 | X           | 99,1                            | 99,1                              | 94,0                                    | 94,1                                 | 94,7                       | 94,7                         |
| 9  | Y           | 93,8                            | 93,8                              | 96,7                                    | 96,7                                 | 93,6                       | 93,6                         |
| 2  | Z           | 94,6                            | 94,6                              | 93,7                                    | 93,7                                 | 99,1                       | 99,2                         |
| 49 | AA          | 94,7                            | 94,6                              | 93,6                                    | 93,7                                 | 99,2                       | 99,2                         |
| 16 | BB          | 94,7                            | 94,7                              | 93,7                                    | 93,6                                 | 99,0                       | 99,1                         |
| 24 | CC          | 94,6                            | 94,6                              | 93,6                                    | 93,6                                 | 99,1                       | 99,1                         |

**Average nucleotide identity (ANI).** Values (%) for one representative isolate of each WGS cluster (Figure 1) in comparison to each of two reference genomes of *K. pneumoniae*, *K. quasipneumoniae*, and *K. variicola*. Shading indicates ANI of  $\geq 96\%$ .

**Table S3**

|             |    | MALDI-TOF cluster |   |   |   |   |   |   |   |   |   |   |   |   |   |   |   |   |   |   |   |   |   |   |   |   |   |    |    |    |   |  |
|-------------|----|-------------------|---|---|---|---|---|---|---|---|---|---|---|---|---|---|---|---|---|---|---|---|---|---|---|---|---|----|----|----|---|--|
|             |    | a                 | b | c | d | e | f | g | h | i | j | k | l | m | n | o | p | q | r | s | t | u | v | w | x | y | z | aa | bb | cc |   |  |
| WGS cluster | W  | 1                 |   |   |   |   |   |   |   |   |   |   |   |   |   |   |   |   |   |   |   |   |   |   |   |   |   |    |    |    |   |  |
|             | X  |                   | 1 |   |   |   |   |   |   |   |   |   |   |   |   |   |   |   |   |   |   |   |   |   |   |   |   |    |    |    |   |  |
|             | A  |                   |   | 2 | 1 | 2 |   |   |   |   |   |   |   |   | 1 |   |   |   |   |   |   |   |   |   |   |   |   |    |    |    |   |  |
|             | N  |                   |   |   |   |   | 1 |   |   |   |   |   |   |   |   |   |   |   |   |   |   |   |   |   |   |   |   |    |    |    |   |  |
|             | U  |                   |   |   |   |   |   | 1 |   |   | 2 |   |   | 1 | 1 |   |   |   |   |   |   |   |   |   |   |   |   |    |    |    |   |  |
|             | B  |                   |   |   |   |   |   |   | 1 |   |   |   |   |   |   |   |   |   |   |   |   |   |   |   |   |   |   |    |    |    |   |  |
|             | H  |                   |   |   |   |   |   |   | 2 |   |   | 1 | 2 |   |   |   |   |   |   |   |   |   |   |   |   |   |   |    |    |    |   |  |
|             | J  |                   |   |   |   |   |   |   | 1 |   |   |   |   |   |   |   |   |   |   |   |   |   |   |   |   |   |   |    |    |    |   |  |
|             | R  |                   |   |   |   |   |   |   | 1 |   |   |   |   |   |   |   |   |   |   |   |   |   |   |   |   |   |   |    |    |    |   |  |
|             | Q  |                   |   |   |   |   |   |   | 1 |   |   |   |   |   |   |   |   |   |   |   |   |   |   |   |   |   |   |    |    |    |   |  |
|             | K  |                   |   |   |   |   |   |   | 2 |   |   |   |   |   |   |   |   |   |   |   |   |   |   |   |   |   |   |    |    |    |   |  |
|             | T  |                   |   |   |   |   |   |   |   | 5 |   |   |   |   |   |   | 1 | 2 |   |   |   |   |   |   |   |   |   |    |    |    |   |  |
|             | V  |                   |   |   |   |   |   |   |   |   | 4 |   |   |   |   |   |   |   |   |   |   |   |   |   |   |   |   |    |    |    |   |  |
|             | L  |                   |   |   |   |   |   |   |   |   |   |   |   | 1 |   |   |   |   |   |   |   |   |   |   |   |   |   |    |    |    |   |  |
|             | S  |                   |   |   |   |   |   |   |   |   |   |   |   | 1 |   |   |   |   |   |   |   |   |   |   |   |   |   |    |    |    |   |  |
|             | P  |                   |   |   |   |   |   |   |   |   |   |   |   |   |   | 1 |   |   |   |   |   |   |   |   |   |   |   |    |    |    |   |  |
|             | D  |                   |   |   |   |   |   |   |   |   |   |   |   |   |   | 1 |   |   |   |   |   |   |   |   |   |   |   |    |    |    |   |  |
|             | I  |                   |   |   |   |   |   |   |   |   |   |   |   |   |   |   |   | 1 |   | 4 |   |   |   |   |   |   |   |    |    |    |   |  |
|             | O  |                   |   |   |   |   |   |   |   |   |   |   |   |   |   |   |   |   | 1 |   |   |   |   |   |   |   |   |    |    |    |   |  |
|             | M  |                   |   |   |   |   |   |   |   |   |   |   |   |   |   |   |   |   | 1 |   |   |   |   |   |   |   |   |    |    |    |   |  |
|             | F  |                   |   |   |   |   |   |   |   |   |   |   |   |   |   |   |   |   |   | 1 |   |   |   |   |   |   |   |    |    |    |   |  |
|             | E  |                   |   |   |   |   |   |   |   |   |   |   |   |   |   |   |   |   |   |   | 1 |   |   |   |   |   |   |    |    |    |   |  |
|             | G  |                   |   |   |   |   |   |   |   |   |   |   |   |   |   |   |   |   |   |   |   |   | 2 |   |   |   |   |    |    |    |   |  |
|             | Z  |                   |   |   |   |   |   |   |   |   |   |   |   |   |   |   |   |   |   |   |   |   |   | 1 |   | 3 | 1 |    |    |    |   |  |
|             | BB |                   |   |   |   |   |   |   |   |   |   |   |   |   |   |   |   |   |   |   |   |   |   | 3 |   | 1 |   |    |    |    |   |  |
|             | AA |                   |   |   |   |   |   |   |   |   |   |   |   |   |   |   |   |   |   |   |   |   |   |   | 1 |   |   |    |    |    |   |  |
| CC          |    |                   |   |   |   |   |   |   |   |   |   |   |   |   |   |   |   |   |   |   |   |   |   | 1 |   |   |   |    |    |    | 2 |  |
| Y           |    |                   |   |   |   |   |   |   |   |   |   |   |   |   |   |   |   |   |   |   |   |   |   |   |   |   |   | 1  |    | 1  |   |  |
| C           |    |                   |   |   |   |   |   |   |   |   |   |   |   |   |   |   |   |   |   |   |   |   |   |   |   |   |   | 1  |    |    |   |  |

**Contingency table.** The number of isolates assigned to the respective WGS/MALDI-TOF cluster combination is indicated.

**Table S4**

| K. pneumoniae (ID 1) | K. pneumoniae NJST258_2 | K. pneumoniae HS11286 | K. varicola (ID 2) | K. varicola At-22 | K. varicola GJ1 | Protein      | m/z     | m/z (dMet) | ≈ m/z   | ≈ m/z (dMet) | Amino Acid Sequence                                                                                                                                                                                                                          |
|----------------------|-------------------------|-----------------------|--------------------|-------------------|-----------------|--------------|---------|------------|---------|--------------|----------------------------------------------------------------------------------------------------------------------------------------------------------------------------------------------------------------------------------------------|
| X                    | X                       | X                     | X                  | X                 | X               | L10p (P0)    | 17801.3 | 17670.1    | 8900.7  | 8835.1       | MALNLQDKQAIVAEVSEVAKGALSAVVADSRGVTVDKMTELRKAGREAGVYMRVVRNTLLRRVVEGTQFECLKDTFVVGPTLIAYSMEHPGAAARLFKEFAKANAKFEVKA<br>AAFEGELIPASQIDRLATLPTYEEA IARLMATMKEASAGKLVRTLAAVRDAKEEA                                                                  |
| X                    | X                       | X                     |                    |                   |                 | L11p (L12e)  | 14876.0 | 14744.8    | 7438.0  | 7372.4       | MAKKVQAYVKLQVAAGMANPSPVPGALQQQGVNIMEFCKAFNAKTDSLEKGLPIPVVITVYADRSTFTVTKTPPAAVLLKKAAGIKSGSGKPNKDKVGIKISRAQLQEIA<br>QTKAADMTGADIEAMTRSIEGTARSMGLVVED                                                                                           |
|                      |                         |                       | X                  | X                 | X               | L11p (L12e)  | 14908.1 | 14776.9    | 7454.0  | 7388.4       | MAKKVQAYVKLQVAAGMANPSPVPGALQQQGVNIMEFCKAFNAKTESMEKGLPIPVVITVYADRSTFTVTKTPPAAVLLKKAAGIKSGSGKPNKDKVGIKISRAQLQEIA<br>QTKAADMTGADIEAMTRSIEGTARSMGLVVED                                                                                           |
| X                    |                         | X                     |                    | X                 | X               | L13p (L13Ae) | 16110.3 | 15979.1    | 8055.1  | 7989.5       | MKTFHTAKPETVTKRDWYVVDATGKTLGRLATELARRLRGKHKA EYTPHVDTGDYIIVLNAEKVAVTGNKREDKMYHHTGHIGGIKEATFEEMIARRPERVIEIAVKGMLP<br>KGPLGRAMYRKLKLVYAGNEHNHAAQQPQVLDI                                                                                        |
|                      | X                       |                       | X                  |                   |                 | L13p (L13Ae) | 16653.0 | 16521.8    | 8326.5  | 8260.9       | MKLLMKFTTAKPETVTKRDWYVVDATGKTLGRLATELARRLRGKHKA EYTPHVDTGDYIIVLNAEKVAVTGNKREDKMYHHTGHIGGIKEATFEEMIARRPERVIEIAV<br>KGMLPKGPLGRAMYRKLKLVYAGNEHNHAAQQPQVLDI                                                                                     |
| X                    | X                       | X                     | X                  | X                 | X               | L14p (L23e)  | 13555.6 | 13424.4    | 6777.8  | 6712.2       | MIQEQTMLNVADNSGARRVMCIKVLGGSHRRYAGVGDIIKITIKEAIPRGKVKKGVDLKA VVVRTKKGVRPDSVIRFDGNACVILNNSEQPIGTRIFGVPVTRRELRT<br>EKFMKIISLAPEVL                                                                                                              |
| X                    | X                       | X                     | X                  | X                 | X               | L15p (L27Ae) | 15135.2 | 15004.0    | 7567.6  | 7502.0       | MRLNTLSPAEGSKKAGKRLGRGIGSGLGKTGGRGHKGQKRSRGGVRRGFEQQMPLYRRLPKFGFTSRKAMITAEIRLSDLAHVEGDVVDLNAKANIIGVQIEFAKV<br>ILSGEVTRPVTVRGLRVTKGARA AIEAAGKIEE                                                                                             |
| X                    | X                       | X                     | X                  | X                 | X               | L16p (L10e)  | 15250.7 | 15119.5    | 7625.3  | 7559.7       | MLQPKRTKFRKVKHGRNRGLAQGTDVSFGTGFLKAVGRGLTARQIEAARRAMTRAVKRGKIWIRVFPDKPITEKPLEVVMGKGNVEYVVALIQPGKVLVEMDGVPE<br>ELAREAFGLAAAKLPICKTTFVTKTVM                                                                                                    |
| X                    | X                       | X                     | X                  | X                 | X               | L17p         | 14446.2 | 14315.0    | 7223.1  | 7157.5       | MRHRKSGRQLNRNSSHRQAMFRNMAGSLVRHEIKTTLPKAKELRRVVEPLITLAKTDSVANRRLAFARTRDNEIVAKLFNELGPRFASRAGGYTRILKCGFRAGDNAPM<br>AYIELVDRAEPKAEAAA                                                                                                           |
| X                    | X                       | X                     |                    |                   |                 | L18p (L5e)   | 12770.1 | 12638.9    | 6385.0  | 6319.4       | MDKKSARIRRATRARRKQLQELGATRLVVHRTPRHIYAQVIAPNGSEVLVAASTVEKAI AEQLKYTGNDAAA AVGKAVAERALEKGIKDVSFDRSGFYHGRVQALADAA<br>REAGLQF                                                                                                                   |
|                      |                         |                       | X                  | X                 | X               | L18p (L5e)   | 12786.1 | 12654.9    | 6393.0  | 6327.4       | MDKKSARIRRATRARRKQLQELGATRLVVHRTPRHIYAQVIAPNGSEVLVAASTVEKAI SEQLKYTGNDAAA AVGKAVAERALEKGIKDVSFDRSGFYHGRVQALADAA<br>REAGLQF                                                                                                                   |
| X                    | X                       | X                     | X                  | X                 | X               | L19p         | 13133.8 | 13002.6    | 6566.9  | 6501.3       | MSNIKQLEQEQMKQDVPSPFRPGDTEVEKVVVVEGSKKRLQAFEGVVI AIRNRGLSHAFTVRKISNGEGVERVFQTHSPVVDIAVKRRGAVRKA KLYLRERTGKSARI<br>KERLN                                                                                                                      |
|                      |                         |                       | X                  | X                 | X               | L1p (L10Ae)  | 24632.4 | 24501.2    | 12316.2 | 12250.6      | MAKLTKRMSVIRDKVDATKQYDINEAISLLKELATAKFVESVDVAVNLGIDARKSDQNVRGATVLPHTGTRSVRVAVFAQGANAEAAKAGAEVLVGMEDLADQIKKGMN<br>FDVVIASPDAMRVVGLGQVLPGRPLMPNPKVGTVPNVAEAVKNAKAGQVRYRNDKNGIIHTTIGKVDADKLENLEALLVALKKAKPTQAKGVYIKKVISITTMGA<br>GVAVDQAGLNASAN |
| X                    | X                       | X                     |                    |                   |                 | L1p (L10Ae)  | 24745.6 | 24614.4    | 12372.8 | 12307.2      | MAKLTKRMRVIREKVDATKQYDINEAIALKELATAKFTESVDVAVNLGIDARKSDQNVRGATVLPHTGTRSVRVAVFTQGANAEAAKAGAEVLVGMEDLAEQIKKGMN<br>FDVVIASPDAMRVVGLGQVLPGRPLMPNPKVGTVPNVAEAVKNAKAGQVRYRNDKNGIIHTTIGKVDADKLENLEALLVALKKAKPTQAKGVYIKKVISITTMGA<br>GVAVDQAGLNASAN  |
| X                    | X                       | X                     | X                  | X                 | X               | L20p         | 13497.4 | 13366.2    | 6748.7  | 6683.1       | MARVVRGVIARARHKKILKQAKGYYGARSRYRVAQVAVIKAGQYAYDRRRQRKRFRQLWIARINAAARQNGISYSKFINGLKKSASVEIDRKILADI AVFPKVAFTALV<br>EKAKAALA                                                                                                                   |
| X                    | X                       | X                     | X                  | X                 | X               | L21p         | 11562.9 | 11431.7    | 5781.4  | 5715.8       | MYAVFQSGGKQHRVSEGTVRLEKLDIATGEAVEFAEVLMIANGEEIKIGVPPFVEGGVIAEVEVAHGRGEKVIKIVFRRRKHRYKQOQHRQWFTDVKITGISA                                                                                                                                      |

|   |   |   |   |   |   |              |         |         |         |         |                                                                                                                                                                                                                                                                               |
|---|---|---|---|---|---|--------------|---------|---------|---------|---------|-------------------------------------------------------------------------------------------------------------------------------------------------------------------------------------------------------------------------------------------------------------------------------|
| X | X | X | X | X | X | L22p (L17e)  | 12196.6 | 12065.4 | 6098.3  | 6032.7  | METLAQHRHARSSAQKVRVLADLIRGKKVSQLDILTYTNKKA AVLKVKVLESAIANAEHNDGADIDDLKVAKIFVDEGSPMKRIMPRAGRADRILKRTSHITVVVSDR                                                                                                                                                                 |
| X | X | X | X | X | X | L23p (L23Ae) | 11213.6 | 11082.4 | 5606.8  | 5541.2  | MIREERLLKVLRAHPVSEKASTAMEKTNITVLKVAKDATKAEIKAAVQKLFVEVEVVNTLVVKGKVKRHRGQRIGRRSDWKKAYVTLKEGQNLDFVGGAE                                                                                                                                                                          |
| X | X | X |   |   |   | L24p (L26e)  | 11316.7 | 11185.5 | 5658.3  | 5592.7  | MAAKIRRDDEVILVTGKDKGKRGKVKVNLSSGKVI VEGINLVKHKQKVPALNQPGGIVEKEAAIQVSNVAIFNAATGKADRVGFRFEDGKKVRFKSNSETIK                                                                                                                                                                       |
|   |   |   | X | X | X | L24p (L26e)  | 11344.7 | 11213.5 | 5672.4  | 5606.8  | MAAKIRRDDEVILVTGKDKGKRGKVKVNLSSGKVI VEGINLVKHKQKVPALNQPGGIVEKEAAIQISNLAI FNAATGKADRVGFRFEDGKKVRFKSNSETIK                                                                                                                                                                      |
| X |   | X | X | X | X | L25p         | 10618.7 | 10487.5 | 5309.3  | 5243.7  | MFTINAEVRKEQGKASRRRLRAANKFPAL IYGGEAAPVAIELDHDKLWNIQDKAEFYGEVTVLVIDGKKEEKVKVQAVQRHAFKPKLTHIDFVRA                                                                                                                                                                              |
|   | X |   |   |   |   | L25p         | 14811.6 | 14680.4 | 7405.8  | 7340.2  | MIARVSGGGYNAARFCIRKADNPPVAGSPVAGFIYRETSMTFINAEVRKEQGKASRRRLRAANKFPAL IYGGEAAPVAIELDHDKLWNNQDKAEFYSEVLTVVVDGKEEKVKVQAVQRHAFKPKLTHIDFVRA                                                                                                                                        |
| X | X | X | X | X | X | L27p         | 9123.9  | 8992.7  | 4562.0  | 4496.4  | MAHKKAGGSTRNDRDSEAKRLGVKRFVGGAEVLAGSIIVRQRGTFKHAGTINVGCCRDTLFDALTDGKVKFEVKGPKNRKFISIVAE                                                                                                                                                                                       |
| X | X | X |   |   |   | L28p @ LSU   | 9006.8  | 8875.6  | 4503.4  | 4437.8  | MSRVCQVTGKRPVGTGNRSHALNATKRRFLPNLHSHRFVWESEKRFVTLRVSAGMRVIDKKGIDTVLAE LRARGEKY                                                                                                                                                                                                |
|   |   |   | X | X | X | L28p @ LSU   | 9022.8  | 8891.6  | 4511.4  | 4445.8  | MSRVCQVTGKRPVGTGNRSHALNATKRRFLPNLHSHRFVWESEKRFVTLRVSAGMRVIDKKGIDTVLSEL RARGEKY                                                                                                                                                                                                |
| X | X | X | X | X | X | L29p (L35e)  | 7243.7  | 7112.5  | 3621.9  | 3556.3  | MKAKELREKSVEELNAELNLLREQFNLRMQAASGQLQTHLLKQVRRDVARVKTLLTQKAGA                                                                                                                                                                                                                 |
| X | X | X | X | X | X | L2p (L8e)    | 29835.6 | 29704.4 | 14917.8 | 14852.2 | MAVVKCKPSPGRRHVVKVNPPELHKGKPFAPLLEKNSKSGGRNNNGRITTRHIGGGHKQAYRIVDFKRNKDGIPAVVERLEYPDNRSANIALVLYKDGERRYILAPKGLKAGDQIQSGVDAAIKAGNTLPMRNI PVGSTVHNEMKPGKGGQLARSAGTYVQIVARDGAYVTLRLRSGEMRKEADCRATLGEVGNAEHMLRVLGKAGAARWVRPTV RGTAMNPVDHPHGGEGRNFGKHPVSPWGLQTKGKKTNRNKRTDKFIVRRRSK |
| X | X | X | X | X | X | L30p (L7e)   | 6514.0  | 6382.8  | 3257.0  | 3191.4  | MAKTIKITQTRSAIGRLPKHKATLLGLGLRRIGHTVEREDT PAVRGMVNAVSMVKVEE                                                                                                                                                                                                                   |
| X | X | X |   |   |   | L31p @ LSU   | 7742.2  | 7611.0  | 3871.1  | 3805.5  | MKKGIIHPNYDEITATCSCGNVMKIRSTVGHDLNLDVCGKCHPFFTGTGKQRDVATGGRVDRFNKRFSIPGSK                                                                                                                                                                                                     |
|   |   |   | X | X | X | L31p @ LSU   | 7770.3  | 7639.1  | 3885.2  | 3819.6  | MKKGIIHPKYEEITATCSCGNVMKIRSTVGHDLNLDVCGKCHPFFTGTGKQRDVATGGRVDRFNKRFSIPGSK                                                                                                                                                                                                     |
| X | X | X |   |   |   | L31p @ LSU   | 9944.6  | 9813.4  | 4972.3  | 4906.7  | MKAHIHPYRTVVFHDTSANEYFKVGSTIRTD RVIELDGETFPYVITDVSSKSHPYTGTGKQTFANEGSAAFRQRFGGFIDAKRKA                                                                                                                                                                                        |
|   |   |   | X | X | X | L31p @ LSU   | 9945.6  | 9814.4  | 4972.8  | 4907.2  | MKAHIHPYRTVVFHDTSVNEYFKVGSTIRTD RVIELDGETFPYVITDVSSKSHPYTGTGKQTFASEGSAARFRQRFGGFIDAKRKA                                                                                                                                                                                       |
|   |   |   | X | X | X | L32p         | 19341.6 | 19210.4 | 9670.8  | 9605.2  | MQKVKLPLTLDPVRTAQKRLDYEGIYARDQVERVADSVSVSDVSDVECSMSFAIDNQLAVITGDAKVTVTLEQCRCGKFPFHVVHTTYCFSPVRNDEQAEALPEAYEPIE VNEFGEIDLQAMVEDEIILSLPVPVVDHSEHCEVSDADMVFGELPEEAQKPNPFAVLASLKRK                                                                                                |
| X | X | X |   |   |   | L32p         | 19361.6 | 19230.4 | 9680.8  | 9615.2  | MQKVKLPLTLDPVRTAQKRLDYEGIYARDQVERVADSVSVSDVSDVECSMSFAIDNQLAVITGDAKVTVTLEQCRCGKFPFHVVHTTYCFSPVRNDEQAEALPEAYEPIE VNEFGEIDLQAMVEDEIILSLPVPVVDHSEHCEVSDADMVFGELPEEAQKPNPFAVLASLKRK                                                                                                |
| X | X | X | X | X | X | L32p @ LSU   | 6430.6  | 6299.4  | 3215.3  | 3149.7  | MAVQQNKPTRSKRGMRRSHDALTA VTSLSVDKTSGEKHLRHHITADGFYRGRKVI AK                                                                                                                                                                                                                   |
| X | X | X | X | X | X | L33p @ LSU   | 6405.9  | 6274.7  | 3202.9  | 3137.3  | MAKGIREKIKLVSSAGTGHFYTTTKNKRTKPEKME LKKYDPVVRQHVIYKEAKIK                                                                                                                                                                                                                      |
| X | X | X | X | X |   | L34p         | 5380.6  | 5249.4  | 2690.3  | 2624.7  | MKRTFQPSVLKRNRSHGFRARMATKNGRQVLARRAKGRARLTVSK                                                                                                                                                                                                                                 |
| X | X | X | X | X | X | L35p         | 7289.2  | 7158.0  | 3644.6  | 3579.0  | MPKIKTVRGAAKRFKKTGKGGFKHKHANLRHILTKKATKRKRHLRPFKAMVSKGDLGLVIACLPYA                                                                                                                                                                                                            |
|   |   |   | X |   | X | L36p @ LSU   | 4364.5  | 4233.3  | 2182.2  | 2116.6  | MKVRASVKKLCRNCKIVKRDGVI RIVICSAPKHKQRQG                                                                                                                                                                                                                                       |
| X | X |   | X | X | X | L36p @ LSU   | 5465.8  | 5334.6  | 2732.9  | 2667.3  | MQVVNSLRS AKQRHPDCQLVKRKRGLYVICKSNPRFKAVQGRKRRR                                                                                                                                                                                                                               |
|   |   |   | X |   |   | L36p @ LSU   | 6690.1  | 6558.9  | 3345.0  | 3279.4  | MQVVNSLRS AKQRHPDCQLVKRKRGLYVICKSNPRFKAVQGRKNAVNGNSPASPAGVGRRR                                                                                                                                                                                                                |
| X | X | X | X | X | X | L3p (L3e)    | 22239.5 | 22108.3 | 11119.7 | 11054.1 | MIGLVGKKGVMTRIFTE DGVSI PVTVIEVEANRVTQVKDLANDGYRAIQVTTGAKKANRVTKPEAGHFAKAGVEAGRGLWEFRLADGEEFTVGNISVELFADVKKVDVTGTSKGGFAGTVKRNFRTO DATHGNLSHRVFGSIGQNQTPGKVFKGKMGAGQLGNERVTVQSLDVVRVDAERNLLLVKGAVPGATGSDLIVKPAVKA                                                              |
| X | X | X | X | X | X | L4p (L1e)    | 22114.4 | 21983.2 | 11057.2 | 10991.6 | MELVLKDAQSALTVSETTFGRDFNEALVHQVVVAYAAGARQGTQRAKTRAEITGSGKFPWRQKGTGRARSGSIKSPIWRSGVTF AARPQDHSQVKNKMYRALKSILSELVQRDLIVVEKFSVEAPKTKLLAQKLDMALEDVLIITGELDENLFLAARNLHKVDVRDANGIDPVSLIAFDKVVMTADAVKQVEEMLA                                                                         |
|   |   |   | X | X | X | L5p (L11e)   | 20275.2 | 20144.0 | 10137.6 | 10072.0 | MAKLHDYKDEVVAKLMTFENYNSVMQVPRVEKITLNMVGGEATADKLLDNAAADLTAISGQKPLITKARKSVAGFKIRQGYPIGCKVTLRGERMWEFFERLITIAVPRIRDFRGLS AKSFDGRGNYSMGRVEQIIFPEIDYDKVDRVRLDITITTTAKSDEEGRALLA AFDFPFRK                                                                                            |



|   |   |   |   |   |   |                      |         |         |         |         |                                                                                                                                                                                                                                                                                                                                                                                                                                                                                                                                                                                                                                                                                     |
|---|---|---|---|---|---|----------------------|---------|---------|---------|---------|-------------------------------------------------------------------------------------------------------------------------------------------------------------------------------------------------------------------------------------------------------------------------------------------------------------------------------------------------------------------------------------------------------------------------------------------------------------------------------------------------------------------------------------------------------------------------------------------------------------------------------------------------------------------------------------|
| X | X | X |   |   |   | L5p (L11e)           | 20302.3 | 20171.1 | 10151.1 | 10085.5 | MAKLHDYKDEVVKMLMTEFNYSVMQVPRVEKITLNMVGGEAIADKKLLDAAADLAAISGQKPLITKARKSVAGFKIRQGYPIGCKVTLRGERMWEFFERLITIAVPR<br>IRDFRGLSAKSFDRGNYSMVGREQIIFPEIDYDKVDRVRGLDITITTTAKSDEEGRALLAAFDFFFRK                                                                                                                                                                                                                                                                                                                                                                                                                                                                                                 |
| X | X | X |   |   |   | L6p (L9e)            | 18844.5 | 18713.3 | 9422.3  | 9356.7  | MSRVAKAPVVVPAGVDVKINGQVITIKGKNGELTRTLNDAVEVKHADNALTFGPRDGYADGWAQAGTARALLNSMVIQVTEGFTTKLQLVGVGYRAAVKGNVNNLALGFS<br>HPVDHQLPAGITAECTPTQTEIVLKGADKQVIGQVAADLRAYRRPEPYKGGKGVRYADEVVRTKEAKKK                                                                                                                                                                                                                                                                                                                                                                                                                                                                                             |
|   |   |   | X | X | X | L6p (L9e)            | 18873.6 | 18742.4 | 9436.8  | 9371.2  | MSRVAKAPVVVPAGVDVKINGQVITIKGKNGELTRTLNDAVEVKHADNALTFGPRDGYADGWAQAGTARALLNSMVIQVTEGFTTKLQLVGVGYRAAVKGNVNNLALGFS<br>HPVEHKLPAAGITAECTPTQTEIVLKGADKQVIGQVAADLRAYRRPEPYKGGKGVRYADEVVRTKEAKKK                                                                                                                                                                                                                                                                                                                                                                                                                                                                                            |
| X | X | X | X | X | X | L7p/L12p<br>(P1/P2)  | 12341.7 | 12210.5 | 6170.8  | 6105.2  | MSITKQIIEAVSAMSVMQVDELISAMEEKFGVSAAAAVALAAGPVEAAEKEFEDVILKAAGANKVAVIAKAVRGATGLGLKEAKDLVESAPAALKEGISKDDAEALKKS<br>LEEAGAEVEVK                                                                                                                                                                                                                                                                                                                                                                                                                                                                                                                                                        |
|   |   |   | X | X | X | L9p                  | 15752.7 | 15621.5 | 7876.3  | 7810.7  | MQVILLDKVANLGSGLDQVNVKAGYARNFLVPOGKAVPATKKNVEFFEARRAELEAKLADLVLSAAEAAAQINALESVTIASKAGDEGKLFSGIGTRDIADAVTAAGVKV<br>AKSEVRLPNGVLRNVGEHEVDFQVHSEVFAKVIINNVAAE                                                                                                                                                                                                                                                                                                                                                                                                                                                                                                                          |
| X | X | X |   |   |   | L9p                  | 15793.7 | 15662.5 | 7896.9  | 7831.3  | MQVILLDKVANLGSGLDQVNVKAGYARNFLVPOGKAVPATKKNVEFFEARRAELEAKLADLVLSAAEAAAQINALESVTIASKAGDEGKLFSGIGTRDIADAVTAAGVKV<br>AKSEVRLPNGVLRNVGEHEVDFQVHSEVFAKVIINNVAAE                                                                                                                                                                                                                                                                                                                                                                                                                                                                                                                          |
| X | X | X | X | X | X | S10p (S20e)          | 11767.0 | 11635.8 | 5883.5  | 5817.9  | MQNQRIRIRLKAFFDHRLLDQSTAEIVETAKTGTAQVRGPIPLPTRKERFTVLI SPHVNKDARDQYEIRTHKRLVDIVEPTEKTVDALMRLDLAAGVDVQISLG                                                                                                                                                                                                                                                                                                                                                                                                                                                                                                                                                                           |
| X | X | X |   |   | X | S11p (S14e)          | 4880.9  | 4749.7  | 2440.5  | 2374.9  | MVKGPGPRESTIRALNAAGFRITNITDVTPIPHNGCRPPKKRRV                                                                                                                                                                                                                                                                                                                                                                                                                                                                                                                                                                                                                                        |
|   |   |   | X |   |   | S11p (S14e)          | 11741.9 | 11610.7 | 5870.9  | 5805.3  | MAHIHASFNNITVITIDRQGNALGWATAGSGFRGRSRKSTPFAAQVAERCAEAVKEYGIKNLEVMVKGPGPRESTIRALNAAGFRITNITDVTPIPHNGCRPPKKRRV                                                                                                                                                                                                                                                                                                                                                                                                                                                                                                                                                                        |
| X | X | X | X | X | X | S12p (S23e)          | 13751.6 | 13620.4 | 6875.8  | 6810.2  | MATINQLVRKPRARKVAKSNVPALEACPQKRGVCTRVYTTTPKKPNSALRKKVCRVRLTNGFEVTSYIGGEGHNLQEHSVILIRGGRVKDLPGVRYHTVRGALDCSGVKDR<br>KQARSKYGVKRPKA                                                                                                                                                                                                                                                                                                                                                                                                                                                                                                                                                   |
| X | X | X | X | X | X | S13p (S18e)          | 13211.0 | 13079.8 | 6605.5  | 6539.9  | MARIAGINIPDHKHTVIALTAIFGIGKTRSKAICAEETGIAENVKISELSEEQIDILREAVGKFFVVEGDLRREITLSIKRLMDLGCYRGLRHRRLPVRGQRTKTNARTRK<br>GPRKPIKK                                                                                                                                                                                                                                                                                                                                                                                                                                                                                                                                                         |
| X | X | X | X | X | X | S14p (S29e)<br>@ SSU | 11578.9 | 11447.7 | 5789.4  | 5723.8  | MAKQSMKAREVKRVALADKFFAKRAELKAIISDVNATDEDRWNAVLLKQLTLPDRSSPSQRNRCRQTGRPHGLRKFGLSRIKVREAAAMRGEIPLGKKASW                                                                                                                                                                                                                                                                                                                                                                                                                                                                                                                                                                               |
|   |   |   | X | X | X | S15p (S13e)          | 10193.1 | 10061.9 | 5096.6  | 5031.0  | MSLSVEAKAKIVSEFGRGENDSGSTEVQVALLTAQINHLQGHFAEHKKDHHSRRGLLRMVSRQRKLLDYLRKRDVARYAALIERLGLRR                                                                                                                                                                                                                                                                                                                                                                                                                                                                                                                                                                                           |
| X | X | X |   |   |   | S15p (S13e)          | 10209.1 | 10077.9 | 5104.6  | 5039.0  | MSLSVEAKAKIVSEFGRGENDSGSTEVQVALLTAQINHLQGHFAEHKKDHHSRRGLLRMVSRQRKLLDYLRKRDVARYAALIERLGLRR                                                                                                                                                                                                                                                                                                                                                                                                                                                                                                                                                                                           |
|   |   |   | X | X | X | S16p                 | 9048.7  | 8917.5  | 4524.4  | 4458.8  | MVTIRLARHGAKKRPFYQVVVTDNRNARNGRFIERVGFNFPIASGAEETRLDLDRIAHWVGLGATVSDRVAALIKAAKAA                                                                                                                                                                                                                                                                                                                                                                                                                                                                                                                                                                                                    |
| X | X | X |   |   |   | S16p                 | 9090.7  | 8959.5  | 4545.4  | 4479.8  | MVTIRLARHGAKKRPFYQVVVTDNRNARNGRFIERVGFNFPIASGAEETRLDLDRIAHWVGLGATVSDRVAALIKAAKAA                                                                                                                                                                                                                                                                                                                                                                                                                                                                                                                                                                                                    |
|   |   |   | X | X | X | S17p (S11e)          | 9674.8  | 9543.6  | 4837.4  | 4771.8  | MTDKIRTLOGRVSDKMEKSIVVAIERMVKHPVYKFIKRTTKLHVHDENNECGIGDVVEIRECRPLSKTKSWTLVRVVEKAVL                                                                                                                                                                                                                                                                                                                                                                                                                                                                                                                                                                                                  |
| X | X | X |   |   |   | S17p (S11e)          | 9703.9  | 9572.7  | 4851.9  | 4786.3  | MTDKIRTLOGRVSDKMEKSIVVAIERMVKHPVYKFIKRTTKLHVHDENNECGIGDVVEIRECRPLSKTKSWTLVRVVEKAVL                                                                                                                                                                                                                                                                                                                                                                                                                                                                                                                                                                                                  |
| X | X | X | X | X | X | S18p @ SSU           | 8986.7  | 8855.5  | 4493.4  | 4427.8  | MARYFRRRFCFRFTAEGVQEIDYKDIATLKNYITESGKIVPSRITGTRAKYQRLARAIKRARYLSLLPYTRHQ                                                                                                                                                                                                                                                                                                                                                                                                                                                                                                                                                                                                           |
| X | X | X | X | X | X | S19p (S15e)          | 10416.7 | 10285.5 | 5208.3  | 5142.7  | MPSRLKKGPFIDLHLLKKEKAVESGDKKPLRTWSRRSTIFPNMIGLTIHVHNGRQHVVFVSDDEMVGHLGGEFAPTRTYRGHAAKAKKK<br>MTESFQALFEESLKEIETRPGSIVRGVVVAIDKDVLVLDAGLKSESAIPAEQFKNAQGELEIQVGDEVDAVDVEDGFGFETLLSREKAKRHEAWITLEKAYEDAETVT<br>GVINGKVKGGFTVELNGIRAFPLPGSLVDVVRVDTLHLEGKELEFKVIKLDQKRNNVVSRRAVIESENSAERDQLENNLQEGMEVKGIVKNLTDYGAFLDGGVDGLL<br>HITDMAWKRKHPSEIVNVGDEITVKVLKFDRETRVSLGKQLGEDPWAIAKRYPEGTKLGRVNTLTDYGCFFEIEBEGVEGLVHVSEMDWTNKNIHPSKVVNVGDV<br>VEVMVLDIDEERRRISLGLKQCKSNPWQQAETHNKGDRVEGKIKSITDFGIFIGLDGGIDGLVHLSDISWNVAGEEAVREYKKGDEIAAVVLQVDAERERISLGVKQL<br>AEDFPNNYVALNKKGAIVVGKVTAVDAKATVELADGVEGYLRASEASRDRVEDATLVLVSGDEVEAKFTGVDRKRNRVLSVRAKDEAEKDAIATVKNQEDANFSNN<br>AMAEAFKAAKGE |
|   | X |   | X | X | X | S20p                 | 6735.2  | 6604.0  | 3367.6  | 3302.0  | MMRTFIKKVYAAIEAGDKAAAQKAFNEMQPIVDRQAAGLIHKNKAARHKANLTAQINKLA                                                                                                                                                                                                                                                                                                                                                                                                                                                                                                                                                                                                                        |
| X | X | X | X | X | X | S21p                 | 8500.2  | 8369.0  | 4250.1  | 4184.5  | MPVIKRENEPFVDVALRRFKRSCAKAGVLAEVRRREFYKPTTERKRAKASAVKRHAKKLARENARRTRLY<br>MATVSMRDLKAGVHFGHQTRYWNPMMKPFIFGARNKVHIINLEKTVPMFNEALAELENKIAARKGKILFVGTKRAASEAVKDAALSCDQFFVNRHWLWGMLTNWKTVRQS<br>IKRLKDLTQSQDGTDFDKLTKEALMRTRELDKLENSLGGIKDMGGLPALFVIADHEHIAIKEANNLGI PVFAIVDTNSDPDGVDFVI PGNDDAIRAVSLYLGAVAAT<br>VREGRSQDLASQAEESEFVEAE                                                                                                                                                                                                                                                                                                                                                 |
| X | X | X |   |   |   | S2p (SAe)            | 26700.6 | 26569.4 | 13350.3 | 13284.7 | MATVSMRDLKAGVHFGHQTRYWNPMMKPFIFGARNKVHIINLEKTVPMFNEALAELENKISARKGKILFVGTKRAASEAVKDAALSCDQFFVNRHWLWGMLTNWKTVRQS<br>IKRLKDLTQSQDGTDFDKLTKEALMRTRELDKLENSLGGIKDMGGLPALFVIADHEHIAIKEANNLGI PVFAIVDTNSDPDGVDFVI PGNDDAIRAVSLYLGAVAAT<br>VREGRSQDLASQAEESEFVEAE                                                                                                                                                                                                                                                                                                                                                                                                                           |
|   |   |   | X | X | X | S2p (SAe)            | 26731.5 | 26600.3 | 13365.8 | 13300.2 | MATVSMRDLKAGVHFGHQTRYWNPMMKPFIFGARNKVHIINLEKTVPMFNEALAELENKISARKGKILFVGTKRAASEAVKDAALSCDQFFVNRHWLWGMLTNWKTVRQS<br>IKRLKDLTQSQDGTDFDKLTKEALMRTRELDKLENSLGGIKDMGGLPALFVIADHEHIAIKEANNLGI PVFAIVDTNSDPDGVDFVI PGNDDAIRAVSLYLGAVAAT<br>VREGRSQDLASQAEESEFVEAE                                                                                                                                                                                                                                                                                                                                                                                                                           |

|   |   |   |   |   |   |                    |         |         |         |         |                                                                                                                                                                                                                                                    |
|---|---|---|---|---|---|--------------------|---------|---------|---------|---------|----------------------------------------------------------------------------------------------------------------------------------------------------------------------------------------------------------------------------------------------------|
| X | X | X | X | X | X | S3p (S3e)          | 25840.1 | 25708.9 | 12920.0 | 12854.4 | MGQKVHPNGIRLGIKPNSTWTFANTKEFADNLDSDFKVRQFLTKELAKASVSRIVIERPAKSIKRVTHITARPQIVIGKKGEDVEKLRKVVADIAGVPAQINIAEVRKPE<br>LDAKLVDASITSQLERRVMFRAMKRAVQNAMRLGAKGKIVKVEVSGRLGGAIEARTEWYREGRVPLHTLRADIDYNTSEAHHTYGVYGVKVVWIFKGEILGGMAAVEQPEPA<br>AQPKKQQRKGRK |
| X | X | X | X | X | X | S4p (S9e) @<br>SSU | 23503.0 | 23371.8 | 11751.5 | 11685.9 | MARYLGPKLKLSRREGTDLFLKSGVRAIDTKCKIEQAPGQHGARKPRLSDYGVQLREKQKQVRRMYGVLERQFRNYKAEARLKGNTGENLLALLEGRLDNVVYRMFGFAT<br>RAEARQLVSHKAIMVNGRVNIIASYQVKANDVVSIREKAKKQSRVKALELAEQREKPTWLEVDAGKMEGTFKRQPERSDLSADINEHLIVELYSK                                  |
|   |   |   | X | X | X | S5p (S2e)          | 17604.2 | 17473.0 | 8802.1  | 8736.5  | MAHIEKQAGELQEKLIAVNRVSKTVKGGRIFSFTALTTVVGDGNGRVGFGYKAREVPAAIQKAMEKARRNMINVALNNGTLQHPVKGVHTGSRVFMQPASEGTGI IAGGA<br>MRAVLEVAGVHNVLAKAYGSTNPINVVVRATIDGLENMNSPEMVAARKGKSVVEILGK                                                                      |
| X | X | X |   |   |   | S5p (S2e)          | 17648.3 | 17517.1 | 8824.1  | 8758.5  | MAHIEKQAGELQEKLIAVNRVSKTVKGGRIFSFTALTTVVGDGNGRVGFGYKAREVPAAIQKAMEKARRNMINVALNNGTLQHPVKGVHTGSRVFMQPASEGTGI IAGGA<br>MRAVLEVAGVHNVLAKAYGSTNPINVVVRATIDGLENMNSPEMVAARKGKSVVEILGK                                                                      |
|   |   |   | X | X | X | S6p                | 15099.4 | 14968.2 | 7549.7  | 7484.1  | MRHYEIVFMVHPDQSEQVPGMIERYTGAITAAAGTIHRLEDWGRRLAYPINKLHKAHYVLLNVEAPQEAIDELETETNFRFNDAVIRSMVMRTKHAVTEASPMVKAKDERR<br>ERREDFANETADDSEAGDSEE                                                                                                           |
| X | X | X |   |   |   | S6p                | 15117.5 | 14986.3 | 7558.7  | 7493.1  | MRHYEIVFMVHPDQSEQVPGMIERYTGAITAAAGTIHRLEDWGRRLAYPINKLHKAHYVLLNVEAPQEAIDELETETNFRFNDAVIRSMVMRTKHAVTEASPMVKAKDERR<br>ERREDFANETADDSEAGDSEE                                                                                                           |
|   |   |   | X | X | X | S7p (S5e)          | 17602.0 | 17470.8 | 8801.0  | 8735.4  | MPRRRVIGQRKILPDPKFGSELLAKFVNIIMVDGKKSTAEAIIVYSALETLAQRSGKNELEAFEVALDNVRPTVEVKSRRVGGSTYQVPVEVRPVRNALAMRWIVEAARK<br>RGDKSMALRLANELTDAADNKGTAVKKREDVHRMAEANKAFAHYRW                                                                                   |
| X | X | X |   |   |   | S7p (S5e)          | 17619.0 | 17487.8 | 8809.5  | 8743.9  | MPRRRVIGQRKILPDPKFGSELLAKFVNIIMVDGKKSTAEAIIVYSALETLAQRSGKSELEAFEVALENVRPTVEVKSRRVGGSTYQVPVEVRPVRNALAMRWIVEAARK<br>RGDKSMALRLANELTDAADNKGTAVKKREDVHRMAEANKAFAHYRW                                                                                   |
| X | X | X |   |   |   | S8p (S15Ae)        | 14099.1 | 13967.9 | 7049.5  | 6983.9  | MSMQDPIADMLTRIRNGQAANKAAVTPSSKLVKVAIANVLKEEGFIEDFKVEGDTKPELELTLYFQKAVVESIQRVSRPGLRIYKKKDELPKVMAGLGIIVVSTSKGV<br>MTDRAARQAGLGGEIICYVA                                                                                                               |
|   |   |   | X | X | X | S8p (S15Ae)        | 14139.1 | 14007.9 | 7069.6  | 7004.0  | MSMQDPIADMLTRIRNGQAANKAAVTPSSKLVKVAIANVLKEEGFIEDFKVEGDIKPELELTLYFQKAVVESIQRVSRPGLRIYKRKDELPKVMAGLGIIVVSTSKGV<br>MTDRAARQAGLGGEIICYVA                                                                                                               |
|   |   |   | X | X | X | S9p (S16e)         | 14826.7 | 14695.5 | 7413.4  | 7347.8  | MAENQYYGTGRRKSSAARVFIKPGNGKIVINQRSLQYFGRETARMVVRQPLELVDMVEKLDLYITVKGGGISGQAGAIRHGITRALMEYDESLRGLRKAGFVTRDARQ<br>VERKKVGLRKARRRPQFSKR                                                                                                               |
| X | X | X |   |   |   | S9p (S16e)         | 14856.8 | 14725.6 | 7428.4  | 7362.8  | MAENQYYGTGRRKSSAARVFIKPGNGKIVINQRSLQYFGRETARMVVRQPLELVDMVEKLDLYITVKGGGISGQAGAIRHGITRALMEYDESLRSELRKAGFVTRDARQ<br>VERKKVGLRKARRRPQFSKR                                                                                                              |

**Characteristics of ribosomal proteins.** Calculated mass peak positions of native and de-methionated (dMet) form of single ( $m/z$ ) charged ribosomal proteins extracted from the annotated genome sequences of *K. pneumoniae* (ID 1) and *K. variicola* (ID 2) isolates and references. Half of  $m/z$  values were used as an approximation for double charged ( $m/2z$ ) ions. “X” denotes the presence of the gene in an isolate or reference genome, which encodes the ribosomal protein with the amino acid sequence shown. Peak positions in the shaded boxes correspond to the observed specific MALDI-TOF mass peaks.

**Table S5**

| Isolate              | Protein                                     | MW      | Amino Acid Sequence                                                          |
|----------------------|---------------------------------------------|---------|------------------------------------------------------------------------------|
| K. pneumoniae (ID 1) | Transposase, IS3/IS911 family               | 8000.56 | MPIVKDVCREAGISEASYNNWREKFGGMEACDIKKMKDFEDENRRLKQMFALSLECRALKDIEKKL           |
| K. variicola (ID 2)  | hypothetical protein                        | 8014.55 | MYNFFHNDMYSETVYFFVLI LFDIFKGI FDFINLYKKAVLCRMRIQGNQTDNDADPTIGIRALSVYVT       |
| K. pneumoniae (ID 1) | hypothetical protein                        | 8015.47 | MI PKTYQQWYRCITTECGIPLTQAFIASRLAVLESQDHQETRRFVSLYGGQHLNSVVQWFKKAGEELL        |
| K. pneumoniae (ID 1) | Prophage P2 OGR protein                     | 8024.46 | MMNCPKCGHAAHTRSSFRVTDQTKERYCQCQNINCGTTFITHE TVVRYIMTPGVIDNAPPHPTAGQGHMNF     |
| K. pneumoniae (ID 1) | Multiple antibiotic resistance protein MarB | 8025.18 | MKLFAAAAIVLLSLASSLSYAEQNTTPVRQNQRDTMIIPSEHNDSPPDFNHMAAGNDKSDDELGPVYQQHDL     |
| K. variicola (ID 2)  | FIG00731318: hypothetical protein           | 8032.79 | MLAVLEFTNDRIKQNSILFIYKSRHIKDIASIDPILCILATNDNLYPPLRMKPLISRANLCMKIITSNNT       |
| K. variicola (ID 2)  | hypothetical protein                        | 8053.49 | MEKQPF TGGFRFCMLIKLRNEFYQVQCDAFGDLATDLLDIRPKILRAMSPDAKKSANSNAWFGDETVGQG      |
| K. variicola (ID 2)  | Uncharacterized protein YtfK                | 8053.99 | MKIFQRYNPLQVAKYVKILFRGRLYIKDVGAFEFDKGKILIPKVKDKLHLSVMSEVNRQVLRQLQTEMA        |
| K. pneumoniae (ID 1) | Uncharacterized protein YtfK                | 8053.99 | MKIFQRYNPLQVAKYVKILFRGRLYIKDVGAFEFDKGKILIPKVKDKLHLSVMSEVNRQVLRQLQTEMA        |
| K. pneumoniae (ID 1) | possible secretory protein                  | 8061.8  | MTLERISAFITICYIAVLAWMGDLSLKDVS TVGGVLI GVLMLAINWYKHKTYQLLRGGKITQGEYESFNR     |
| K. pneumoniae (ID 1) | FIG00731318: hypothetical protein           | 8075.78 | MLAVLEFTNDRIKQNSILFIYKSRHIHDIASIDPILCILATNDNLYPPLRMKPLISRANLCMKIITSNNT       |
| K. pneumoniae (ID 1) | Putative cytoplasmic protein USSDB7A        | 8088.32 | MYQILDAGVESEYFNIILENVKTGITPNLFPD SGTGTHSETIQLRYEAITWKHCDGNIYKDSWNHRATA       |
| K. pneumoniae (ID 1) | FIG00732958: hypothetical protein           | 8106.59 | MTHYRFPNVRRRENSRLSYTKLRHQARLYGNFFHLFCLYGNDCVAALSITKTLNLLIWKGYDSTRSSIF        |
| K. variicola (ID 2)  | hypothetical protein                        | 8113.93 | MFGMLYRRNAREKCYFAIGNLKI FHDAKYTF LFCGFI FDLFRVYLTDKDGF LFI VMAWRNKALAGKCR    |
| K. pneumoniae (ID 1) | hypothetical protein                        | 8119.19 | MKIKCIKDTEGYWTEGEMYPARVVAGGFVQVGD DDDPNGEWSAAPMEYREDGSI VYVGGIEGDVLFEEASHD   |
| K. variicola (ID 2)  | Integrase, catalytic region                 | 8122.42 | MNKRGNCDNAVAELFFSSLKKERISKRIYKNRDLARADVFDYIKVFNRRARRHSHPGGVSPEAFEQASS        |
| K. variicola (ID 2)  | Integrase, catalytic region                 | 8123.36 | MNKRGNCDNAVAELFFSSLKKERISKRIYKNRDLARADVFDYIEVFNRRARRHSHPGGVSPEAFEQASS        |
| K. variicola (ID 2)  | Uncharacterized protein YbfA                | 8129.88 | MMALYKAYPAHII LLRRFAVAVAGVAALPVMLFWKDRARYY SWLHRVWSKTSEQPVWMAQAEKAAHDFY      |
| K. pneumoniae (ID 1) | Uncharacterized protein YbfA                | 8129.88 | MMALYKAYPAHII LLRRFAVAVAGVAALPVMLFWKDRARYY SWLHRVWSKTSEQPVWMAQAEKAAHDFY      |
| K. pneumoniae (ID 1) | Prevent host death protein, Phd antitoxin   | 8133.39 | MRTVNYSEARQNADLVLES AVTGVPTITRRGHKSAV IISAEFEFERYQAARIDDEFAAIMAVHGDEIRELADK  |
| K. variicola (ID 2)  | FIG00798715: hypothetical protein           | 8133.83 | KRQFLASGYMHLPGKKIVSVTASHDELTP LARKLAQSLFRQAKKHFDRLHAQDQIKRKARRERLRELKV       |
| K. pneumoniae (ID 1) | hypothetical protein                        | 8140.55 | MRASVIAFGSLLIQQYAHNQYGHHRHNTDINNHSVRQKLQ LNGYGGQVKAHLIVVKECTLPSTIEQTFID      |
| K. variicola (ID 2)  | hypothetical protein                        | 8158.69 | MSSYDSRVQLTSKSVIYKFLVHADSPQGARVKVQNH LRLKLGDFDFSEICISSMEVRGDVLLNPDGKCLII     |
| K. variicola (ID 2)  | Prevent host death protein, Phd antitoxin   | 8165.45 | MRTVNYSEARQNADLVLES AVTGIPTITRRGHKSAV IISAEFEFERYQAARMDDEFAAIMAVHGDEIRELADK  |
| K. variicola (ID 2)  | FIG00732852: hypothetical protein           | 8165.61 | MMQRCLNDDREWIRHHRNQCLKKAQRPPAPKEEFADLHQAAKETQYRMGI AKPYGEAFRLPGKGTAAE        |
| K. pneumoniae (ID 1) | hypothetical protein                        | 8172.51 | RGPGAESGAARPVGFVGRLLDDPTGIVAARSLSFVRVQARRNEAEDPLADAI REIDAPIWIGDRHWGAIRMGYRP |
| K. pneumoniae (ID 1) | FIG00732852: hypothetical protein           | 8180.62 | MMQRCLDDEWIRHHRNQCLKKAQRPPAPKEEFADLHQAAKETQYRMGI AKPYGEAFRLPGKGTAAE          |

|                      |                                             |         |                                                                                 |
|----------------------|---------------------------------------------|---------|---------------------------------------------------------------------------------|
| K. variicola (ID 2)  | hypothetical protein                        | 8186.54 | MKQQFSTASNYSEACDMLRSGYVKHVRLNWNIGSDEFFRIASDWCDTGAKIKKDEDDGFIISLKGFPPIPRQH       |
| K. pneumoniae (ID 1) | hypothetical protein                        | 8186.54 | MKQQFSTASNYSEACDMLRSGYVKHVRLNWNIGSDEFFRIASDWCDTGAKIKKDEDDGFIISLKGFPPIPRQH       |
| K. variicola (ID 2)  | hypothetical protein                        | 8187.79 | MCTPKIINQLLNKSYDNSLYLTTSYVNETIQHREYHERCIGHTKIDMHQVLSRIFSAKPIISVGIKKPAR          |
| K. variicola (ID 2)  | hypothetical protein                        | 8189.73 | MHHHPVKSSRIISVAYDDASATLEIYFYHQPPLOYTGVPPRIFRDFLQVVSKGRFYDGVIKGKFFPERKPR         |
| K. variicola (ID 2)  | hypothetical protein                        | 8190.17 | MIARQGNQKWHFHSSTEVKVCSELTQLQHIKYYIKVKIQEKNTLLFLIFCKVRSKGSLSKISLVVGLFVA          |
| K. variicola (ID 2)  | hypothetical protein                        | 8192.81 | MQTDHRIYPIAPLFCRVALHLPDQADAPTVMKDSRWLSFLFGDGMSCRVIFIQHGSRICAGWRLTPYPAY          |
| K. variicola (ID 2)  | hypothetical protein                        | 8196.74 | MSTPDFSTAENQELAQEVSLKAMITLMLQAMQADAGRVIKMEKQIAQMEDEAQAAVFSSTVKIKQAYRQ           |
| K. variicola (ID 2)  | hypothetical protein                        | 8197.7  | MKKSFLHEQLSEAEATELVERYRKNCCVVEKSLSRDFASWEIRVLLPESKPPRIDRTYTIQKMWDR              |
| K. pneumoniae (ID 1) | Putative inner membrane protein STM3160     | 8199.96 | MNLLFCTSAPIQAKILPGPRLAAFLLRKRKENRDLHNSVNTNENHYQFDVVLILLWADFVIIVVEIERG           |
| K. pneumoniae (ID 1) | hypothetical protein                        | 8200.68 | MDLSAGQTPFGALVDELPPATQPLSNPASTSAIAPCLNVIFAILIVISQEISADFQIISKGYNIPARHQAIKSPPAAGS |
| K. pneumoniae (ID 1) | hypothetical protein                        | 8202.73 | MHHHPVKSSRIISVAYDDASATLEIYFYHQPPLOYTGVPPRIFHDFLQVVSKGRYDGVIKGKFFPERKLR          |
| K. variicola (ID 2)  | UPF0370 protein YpfN                        | 8212.75 | MEWLIKHWIILVLFVLGVINVIKDLNRVDHKKFLNNKPDLPPhRDFNDKWDDEDDWPKHDQSKKP               |
| K. pneumoniae (ID 1) | UPF0370 protein YpfN                        | 8212.75 | MEWLIKHWIILVLFVLGVINVIKDLNRVDHKKFLNNKPDLPPhRDFNDKWDDEDDWPKHDQSKKP               |
| K. variicola (ID 2)  | hypothetical protein                        | 8212.91 | MKIEFNDKGVATATITSTVFEFRLHNRVDTALFLAPSVRAKRSQFFILKTVITGKTSVLRAYKAIKAEASR         |
| K. variicola (ID 2)  | UPF0337 protein YjbJ                        | 8216.46 | MNKDEIGGNWQLKKGAKQWGLTDDMTVIEGKRDQLVGIQERYGYAKDQAEKEVSDWEHKNDYRW                |
| K. variicola (ID 2)  | IS1 protein InaA                            | 8218.84 | MRNGKSTAGHQRYLCSHCRKTWQLTFTYAASQPGTHQKIIDMAMNGVGRATARLMGVGLNTILRHLKNSGRSQ       |
| K. variicola (ID 2)  | Hnh endonuclease                            | 8225.84 | MSKQDYFENSLDVEENIISLCCNCHKQIHLGKGFEDMLRKIYAERKDVLLKAGIEILLEDLILFYKMEGN          |
| K. pneumoniae (ID 1) | hypothetical protein                        | 8226.85 | MSTPDFSTAENQELAQEVSLKAMITLMLQAMQADAGRVIKMEKISQMEDEAQAAVFSSTVKIKQAYRQ            |
| K. variicola (ID 2)  | hypothetical protein                        | 8228.67 | MREIPDCPICGSAAEFYFRDYQAGACSGALRCPYGLRVQDSYWAGGKSKSKIRLIEKWSQQVEQKKGEVKNQ        |
| K. variicola (ID 2)  | Protein nifT                                | 8228.7  | MPIVIFRERGEALYAIKQDLEARVLQVEHDETDRWGGIAALEGGRRYVNPQGRVFPFISLRATRSTLL            |
| K. variicola (ID 2)  | Putative outer membrane lipoprotein STM0080 | 8234.52 | MRNNILVASALAATAIMFVAGCSSNQSIKTTDGKTIIVTSGKPQVDDDTGLVSYKNAETGRVEQINRDQVKSMDLND   |
| K. pneumoniae (ID 1) | Putative outer membrane lipoprotein STM0080 | 8234.52 | MRNNILVASALAATAIMFVAGCSSNQSIKTTDGKTIIVTSGKPQVDDDTGLVSYKNAETGRVEQINRDQVKSMDLND   |
| K. variicola (ID 2)  | hypothetical protein                        | 8236.82 | MGIVKISDLLHDDIRDASKAMRSVNAQAEYWIIRLGMSELYPELNHQIKLLMLKSGSDRLLLEVINAINN          |
| K. pneumoniae (ID 1) | hypothetical protein                        | 8236.82 | MGIVKISDLLHDDIRDASKAMRSVNAQAEYWIIRLGMSELYPELNHQIKLLMLKSGSDRLLLEVINAINN          |
| K. variicola (ID 2)  | Uncharacterized protein YncJ                | 8239.47 | MSALLLCCALFSGHLLAHRQGHDFPVQSLEQQLLHEADSDELSQCBEAAADLNEHHRWQDARKPRAPHCP          |
| K. variicola (ID 2)  | Uncharacterized protein YpeB                | 8244    | MDKAQLVEIANTEMPFGYKGRRLIDVPEEYLLWFARKDQFPAGHLGELMALLIKTEGLSDLVQPLKKAR           |
| K. pneumoniae (ID 1) | Uncharacterized protein YpeB                | 8244    | MDKAQLVEIANTEMPFGYKGRRLIDVPEEYLLWFARKDQFPAGHLGELMALLIKTEGLSDLVQPLKKAR           |
| K. variicola (ID 2)  | Phage protein                               | 8245.68 | MPFLDVTDLDPDFVDSLVCYRQVQTVDEDNFPTNTAQAIPIFSGVVTVDRSLEAKRMAAGQNINGAILIVTQF       |
| K. variicola (ID 2)  | Phage protein                               | 8245.68 | MPFLDVTDLDPDFVDSLVCYRQVQTVDEDNFPTNTAQAIPIFSGVVTVDRSLEAKRMAAGQNINGAILIVTQF       |
| K. pneumoniae (ID 1) | Uncharacterized protein YodD                | 8248.22 | MMKHQLTGQTDGDDLVNVDALLAAINEISESEVHRTLDDPQRASIDGRGSHTWRELAFAFELDIHDFSASEANR      |



|                      |                                                                 |         |                                                                                   |
|----------------------|-----------------------------------------------------------------|---------|-----------------------------------------------------------------------------------|
| K. variicola (ID 2)  | Tautomerase PptA                                                | 8391.93 | MPHVDIKCFPRELTDQKTALAADITEVLIIRHLNSKESAVSVALTQVEPDAWQAVWDSEIAPQMAQLIKKPGYSM       |
| K. pneumoniae (ID 1) | Tautomerase PptA                                                | 8391.93 | MPHVDIKCFPRELTDQKTALAADITEVLIIRHLNSKESAVSVALTQVEPDAWQAVWDSEIAPQMAQLIKKPGYSM       |
| K. pneumoniae (ID 1) | Cytochrome c-type biogenesis protein CcmD, interacts with CcmCE | 8393.88 | MSPAFSSFAAFLNMGYAVYVNLAVAVTAAFGLLTVHTLWARRALFHEVRRQQAERRIAAAREHDKEAADASAS         |
| K. variicola (ID 2)  | hypothetical protein                                            | 8396.68 | MSRDPFQRRGAARETAVPLTARRSLAGVQGAQGTARQGGASGTEAASLPLTLRHGMEARQGGDSLGSVHDSPPGRPLQDLK |
| K. pneumoniae (ID 1) | Uncharacterized protein YobH                                    | 8403.22 | MRLIIRTIIILVAIILWIGVLLSGYVLFHSEENVGGLKLCQYLRTARGVSTALYVHSDSGVIGVSSCPLLRKRSTTVVDNG |
| K. variicola (ID 2)  | hypothetical protein                                            | 8403.89 | MADITQEDWVMEKGIVAKMYMTPRQIKSYREGRWIEGVHYKKHSPDPEASEGRVTLTYNYTRINRLVGET            |
| K. variicola (ID 2)  | hypothetical protein                                            | 8405.26 | MQGCEQAMAVMQAKLPTRPFAGMTQIRFKGFGLRHLSPHGTPLGSAMLYDIHLLNTITALSICIAMAFFCDSQHFFV     |
| K. variicola (ID 2)  | hypothetical protein                                            | 8413.07 | MKKECRVVIYKEGLLGLSLFFGEAKADPKMSQFLSSYTREGWEVKTMSVERRRRTALFWSREAYLFLVLERPL         |
| K. variicola (ID 2)  | Uncharacterized protein Yoaf                                    | 8417.09 | MKLLLAILPLVLGCAQPPQSTAPTAKTIGMPNPAVSYCQQSGGTRVPVQTPQGVSTQCKLPSGETLDEWALWRRDHPAKS  |
| K. variicola (ID 2)  | Phage protein                                                   | 8424.11 | MKIEFKDQGSDSVITVSTVFEFRHRNRADVALLLTTEMTSQRSGFFIMKTIILSGKTHVLRAYKHLLEAK            |
| K. pneumoniae (ID 1) | FIG00731545: hypothetical protein                               | 8428.98 | MSRIAINHNRQCHSSSLAMFCDQTNALRRRRDGVQNSVMETTIAARATRIVTRPSVNMAPRFAVAQDCARRGAI        |
| K. pneumoniae (ID 1) | FIG00731353: hypothetical protein                               | 8432.01 | MHIKNTI PAEFVFNLSALMKNIENTLIKQHRVTNNERMITEIQHRLQTESNEILSDLYLQALDMLYSKKPHH         |
| K. variicola (ID 2)  | FIG00731353: hypothetical protein                               | 8434.99 | MHIKNTI PAEFVFNLSALMKNIENTLMKQHS TINNERMITEIQHRLQTESNEILSDLYLQALDMLYSKKHHH        |
| K. pneumoniae (ID 1) | Uncharacterized protein Yoaf                                    | 8437.17 | MKLLLAILPLVLGCAQPPQSTAPTAKTIGMPNPAVSYCQQSGGTRVPVQTPQGVSTQCKLPSGETLDEWALWRRDHPAKS  |
| K. pneumoniae (ID 1) | FIG00731602: hypothetical protein                               | 8444.5  | MTKGIKIFITVVFVILALLSGMMSFMIVGMVSGSGCGQECFDNMSAKFISIFWILAIISGIFAFMDNGNPKKNPQ       |
| K. variicola (ID 2)  | hypothetical protein                                            | 8466.26 | MNLYAFNPLKQNDQEVLTVPVAFNLVLSLPEQLKRLDKVGYELVKRYGIAGCSDKQRHHIAIVHLLKHTLR           |
| K. variicola (ID 2)  | hypothetical protein                                            | 8466.99 | MTFYETIMLWFSTIVSALYLIAGGWVKIRDYIKAKAQAKSDAIEEEVQTRLKAAQASADAPAAATATSVAGPVAESKTAA  |
| K. pneumoniae (ID 1) | putative ATP/GTP-binding protein remnant                        | 8467.93 | MRKPVYAYVAQESHDPDSQGEKNTWWTKVGVAFPFHGKSGLNIVLTPGIAVSGKLVLEPREENNPPQNTGPIETVS      |
| K. pneumoniae (ID 1) | hypothetical protein                                            | 8469.28 | MHVNVVYVEKSGRCFTDLLKKLYLFRFQVLLPSTLLVSSRLLTSEYKLRDLQVLSLLIPFSWLLFDRFDQV           |
| K. variicola (ID 2)  | hypothetical protein                                            | 8472.42 | MSPGFRSFLRFARIPVDSSELVRRKFGSRLIGIVTLCLLPLLVFDPVQWVFIQSQVIWAGVYIGLSVAGDKTRPR       |
| K. variicola (ID 2)  | FIG00732217: hypothetical protein                               | 8472.75 | MFPFVIFMGVTERDGTTLRGYMGGTGREHFGQCTGLSALGNLQRAHTCAAGTDNNSIKLSDWQFHYTPHTTTNP        |
| K. variicola (ID 2)  | hypothetical protein                                            | 8485.92 | MNYAGHEKLRAEVAGLANMCDLRATLNNMEHRYRFDSDVLAERLRTQTLFRINALFMAAYNDILELDACFKD          |
| K. variicola (ID 2)  | hypothetical protein                                            | 8488.31 | MTVTIVSPSAEAVKPRRHPRIFRADIPAPEIDPALKAFGRHIARSHRKRGRVHIIPAMKNAAFGQVLRITLLELKRAF    |
| K. variicola (ID 2)  | putative DNA-binding protein                                    | 8497.9  | MTDEEESLQAVTASKTVLNQKQLELLELVFDQLPEVEQDRFIELARTRLEELDRFMAEFLSKRKIPPPFEKD          |

**Annotated gene products.** Calculated molecular weight (MW) and amino acid sequence of annotated proteins from *K. pneumoniae* (ID 1) and *K. variicola* (ID 2) within the 8,000–8,500 Da range. Tentative peak matching proteins are shown in the shaded rows.
